# Supplementary material for: Agent-Based Model with Asymmetric Trading and Herding for Complex Financial Systems
Source: PubMed Central journal article supplement (PMC3835857; doi:10.1371/journal.pone.0079531), 2013-11-20
Supplement: pone.0079531.s002.pdf [file pone.0079531.s002.pdf]

## Appendix S2

### Derivation of $\Delta r$

According to Eq. (11) in the main body of the paper, the herding degree of bull markets ( $r(t) > 0$ ) and bear markets ( $r(t) < 0$ ) are defined as

$$\begin{cases} d_{bull}(r(t)) = \sum_{t,r(t)>0} [V(t) \cdot r(t)] / \sum_{t,r(t)>0} V(t) \\ d_{bear}(r(t)) = \sum_{t,r(t)<0} [V(t) \cdot |r(t)|] / \sum_{t,r(t)<0} V(t) \end{cases} .$$

We introduce a shifting of  $r(t)$ , denoted by  $\Delta r$ , such that  $d_{bull}(r'(t)) = d_{bear}(r'(t))$  with  $r'(t) = r(t) + \Delta r$ . With  $r(t)$  replaced by  $r'(t)$  in the above equation, we have

$$\begin{cases} d_{bull}(r'(t)) = \sum_{t,r'(t)>0} \{V(t) \cdot [r(t) + \Delta r]\} / \sum_{t,r'(t)>0} V(t) \\ d_{bear}(r'(t)) = \sum_{t,r'(t)<0} [V(t) \cdot |r(t) + \Delta r|] / \sum_{t,r'(t)<0} V(t) \end{cases} .$$

$\Delta r$  is first assumed to be small, and this is verified from the practical calculation. Hence,  $r'(t) > 0$  and  $r'(t) < 0$  are approximately  $r(t) > 0$  and  $r(t) < 0$ , respectively. Therefore,

$$\begin{cases} d_{bull}(r'(t)) = \sum_{t,r(t)>0} \{V(t) \cdot [r(t) + \Delta r]\} / \sum_{t,r(t)>0} V(t) \\ d_{bear}(r'(t)) = \sum_{t,r(t)<0} [V(t) \cdot |r(t) + \Delta r|] / \sum_{t,r(t)<0} V(t) \end{cases} .$$

Thus, we have

$$d_{bull}(r'(t)) = \sum_{t,r(t)>0} [V(t) \cdot r(t)] / \sum_{t,r(t)>0} V(t) + \Delta r,$$

and

$$\begin{aligned} d_{bear}(r'(t)) &= - \sum_{t,r(t)<0} [V(t) \cdot r(t)] / \sum_{t,r(t)<0} V(t) - \Delta r \\ &= \sum_{t,r(t)<0} [V(t) \cdot |r(t)|] / \sum_{t,r(t)<0} V(t) - \Delta r. \end{aligned}$$

Inserting the above two equations into  $d_{bull}(r'(t)) = d_{bear}(r'(t))$ , we have

$$\sum_{t,r(t)>0} [V(t) \cdot r(t)] / \sum_{t,r(t)>0} V(t) - \sum_{t,r(t)<0} [V(t) \cdot |r(t)|] / \sum_{t,r(t)<0} V(t) + 2\Delta r = 0.$$

Therefore,

$$\begin{aligned} \Delta r &= \frac{1}{2} \left\{ \frac{\sum_{t,r(t)<0} [V(t) \cdot |r(t)|]}{\sum_{t,r(t)<0} V(t)} - \frac{\sum_{t,r(t)>0} [V(t) \cdot r(t)]}{\sum_{t,r(t)>0} V(t)} \right\} \\ &= \frac{1}{2} [d_{bear}(r(t)) - d_{bull}(r(t))]. \end{aligned}$$
