# Supplementary material for: Agent-Based Model with Asymmetric Trading and Herding for Complex Financial Systems
Source: PubMed Central journal article supplement (PMC3835857; doi:10.1371/journal.pone.0079531), 2013-11-20
Supplement: pone.0079531.s003.pdf [file pone.0079531.s003.pdf]

## Appendix S3

### Equivalence of the shifting to $R(t)$ and that to $R'(t)$

According to Eq. (3) in the main body of the paper,  $R'(t)$  is defined as

$$R'(t) = k \cdot \sum_{i=1}^M \left[ \gamma_i \sum_{j=0}^{i-1} R(t-j) \right].$$

To prove that the shifting to  $R(t)$  is equivalent to the shifting to  $R'(t)$ , it's identical to prove the equation:

$$R'(t) + c = k \cdot \sum_{i=1}^M \left\{ \gamma_i \sum_{j=0}^{i-1} [R(t-j) + c] \right\},$$

where  $c$  is a constant. The term on the right-hand side of this equation is

$$\begin{aligned} k \cdot \sum_{i=1}^M \left\{ \gamma_i \sum_{j=0}^{i-1} [R(t-j) + c] \right\} &= k \cdot \sum_{i=1}^M \left[ \gamma_i \sum_{j=0}^{i-1} R(t-j) + \gamma_i \sum_{j=0}^{i-1} c \right] \\ &= k \cdot \sum_{i=1}^M \left[ \gamma_i \sum_{j=0}^{i-1} R(t-j) \right] + k \cdot \sum_{i=1}^M (\gamma_i \cdot i \cdot c) \\ &= R'(t) + k \cdot \sum_{i=1}^M (\gamma_i \cdot i \cdot c). \end{aligned}$$

Since  $k = 1/(\sum_{i=1}^M \sum_{j=i}^M \gamma_j)$ , we have

$$\begin{aligned} k \cdot \sum_{i=1}^M \left\{ \gamma_i \sum_{j=0}^{i-1} [R(t-j) + c] \right\} &= R'(t) + \frac{\sum_{i=1}^M (\gamma_i \cdot i \cdot c)}{\sum_{i=1}^M \sum_{j=i}^M \gamma_j} \\ &= R'(t) + c \cdot \frac{\sum_{i=1}^M (i \cdot \gamma_i)}{(\gamma_1 + \gamma_2 + \cdots + \gamma_M) + (\gamma_2 + \cdots + \gamma_M) + \cdots + (\gamma_{M-1} + \gamma_M) + \gamma_M} \\ &= R'(t) + c \cdot \frac{\sum_{i=1}^M (i \cdot \gamma_i)}{\gamma_1 + 2\gamma_2 + 3\gamma_3 + \cdots + M\gamma_M} \\ &= R'(t) + c. \end{aligned}$$

Therefore, the shifting to  $R(t)$  is equivalent to the shifting to  $R'(t)$ .
