# Supplementary material for: Agent-Based Model with Asymmetric Trading and Herding for Complex Financial Systems
Source: PubMed Central journal article supplement (PMC3835857; doi:10.1371/journal.pone.0079531), 2013-11-20
Supplement: pone.0079531.s004.pdf [file pone.0079531.s004.pdf]

# Appendix S4

## The values of $\alpha$ , $\Delta r$ and $\Delta R$ for eight more indices

The values of  $V_+/V_-$ ,  $d_{bull}$ ,  $d_{bear}$ ,  $\alpha$ ,  $\Delta r$  and  $\Delta R$  for eight more indices are displayed below in Table 1. In the simulation for all these indices, the parameter  $\alpha$  is set to be 1.0. As described in the main body of the paper, a negative  $\Delta R$  in the simulation produces the anti-leverage effect, while a positive one yields the leverage effect. These results are in agreement with the empirical ones, and further confirm the methods for the determination of the key parameters and the simulations for the leverage and anti-leverage effects.

Table 1: **The values of  $V_+/V_-$ ,  $d_{bull}$ ,  $d_{bear}$ ,  $\alpha$ ,  $\Delta r$  and  $\Delta R$  for the eight indices.**  $V_+/V_-$ ,  $d_{bull}$  and  $d_{bear}$  are determined from the historical data for each index. We calculate  $\alpha$  from  $\alpha + \beta = 2$  and  $\alpha/\beta = V_+/V_-$ , and  $\Delta r$  from  $\Delta r = \frac{1}{2}(d_{bear} - d_{bull})$ . Student's  $t$ -test is performed to analyze the statistical significance of  $\Delta r$ . A  $p$ -value less than 0.05 is considered statistically significant. We compute  $\Delta R$  from the linear relation between  $\Delta r$  and  $\Delta R$  for all these indices. As  $\Delta R$  for the London gold spot price index is negative, it is rounded down to the nearest integer, while  $\Delta R$  for other indices are positive, and each of them is rounded up to the nearest integer.

| Price Index                  | $V_+/V_-$ | $d_{bull}$ | $d_{bear}$ | $\alpha$        | $\Delta r$         | $p$ -value           | $\Delta R$ |
|------------------------------|-----------|------------|------------|-----------------|--------------------|----------------------|------------|
| Australia stock (2003-2012)  | 1.00      | 0.739      | 0.824      | $1.00 \pm 0.01$ | $0.043 \pm 0.004$  | $4.2 \times 10^{-4}$ | 2          |
| Belgium stock (2004-2012)    | 0.92      | 0.889      | 0.943      | $0.96 \pm 0.02$ | $0.027 \pm 0.005$  | $5.7 \times 10^{-3}$ | 2          |
| France stock (2004-2012)     | 0.94      | 0.800      | 0.853      | $0.97 \pm 0.01$ | $0.027 \pm 0.004$  | $2.5 \times 10^{-3}$ | 2          |
| India stock (2003-2012)      | 0.98      | 0.769      | 0.913      | $0.99 \pm 0.01$ | $0.072 \pm 0.007$  | $5.0 \times 10^{-4}$ | 3          |
| Ireland stock (2004-2012)    | 1.02      | 0.731      | 0.817      | $1.01 \pm 0.01$ | $0.043 \pm 0.004$  | $4.2 \times 10^{-4}$ | 2          |
| Maxico stock (2001-2012)     | 1.02      | 0.785      | 0.814      | $1.01 \pm 0.01$ | $0.015 \pm 0.002$  | $1.7 \times 10^{-3}$ | 1          |
| NewZealand stock (2004-2012) | 1.02      | 0.720      | 0.803      | $1.01 \pm 0.02$ | $0.042 \pm 0.004$  | $4.7 \times 10^{-4}$ | 2          |
| London gold spot (1996-2004) | 0.95      | 0.792      | 0.681      | $0.97 \pm 0.01$ | $-0.056 \pm 0.004$ | $1.5 \times 10^{-4}$ | -3         |
