# Supplementary material for: Agent-Based Model with Asymmetric Trading and Herding for Complex Financial Systems
Source: PubMed Central journal article supplement (PMC3835857; doi:10.1371/journal.pone.0079531), 2013-11-20
Supplement: pone.0079531.s005.pdf [file pone.0079531.s005.pdf]

# Appendix S5

## How $N$ affects the model parameters and simulation results

Since  $\alpha$  is determined from  $\alpha + \beta = 2$  and  $\alpha/\beta = V_+/V_-$ , and  $\Delta r$  from  $\Delta r = \frac{1}{2}(d_{bear} - d_{bull})$ , both  $\alpha$  and  $\Delta r$  are not dependent on the number of agents (denoted by  $N$ ). On the other hand,  $\Delta R$  is calculated from the linear relation between  $\Delta R$  and  $\Delta r$ , which is obtained through the simulation of the model. As shown below in Table 1, the slope of the linear relation increases as  $N$  grows, and it leads to a larger magnitude of  $\Delta R$  for larger  $N$ . In the main body of the paper, for simplicity,  $\Delta R$  is approximated to an integer in the simulation for each index. To investigate how  $N$  affects the simulation results, however,  $\Delta R$  should be more accurate, and it is now corrected to one decimal place. The influence of  $N$  on  $L(t)$  is displayed in Fig. 1. The amplitude of  $L(t)$  increases with  $N$ , but gradually converges for larger  $N$ . For  $A(t)$  and  $P(|r(t)| > x)$ , the cases are similar.

Table 1: The values of  $\Delta R$  and the relations between  $\Delta R$  and  $\Delta r$  for different  $N$  for the S&P 500 and Shanghai indices.

| $N$   | relation of $\Delta R$ and $\Delta r$ | S&P 500 Index |            | Shanghai Index |            |
|-------|---------------------------------------|---------------|------------|----------------|------------|
|       |                                       | $\Delta r$    | $\Delta R$ | $\Delta r$     | $\Delta R$ |
| 1250  | $\Delta R = 12.4\Delta r$             | 0.067         | 0.8        | -0.043         | -0.5       |
| 2500  | $\Delta R = 17.6\Delta r$             | 0.067         | 1.2        | -0.043         | -0.8       |
| 5000  | $\Delta R = 25.4\Delta r$             | 0.067         | 1.7        | -0.043         | -1.1       |
| 10000 | $\Delta R = 38.2\Delta r$             | 0.067         | 2.6        | -0.043         | -1.6       |
| 20000 | $\Delta R = 61.6\Delta r$             | 0.067         | 4.1        | -0.043         | -2.6       |

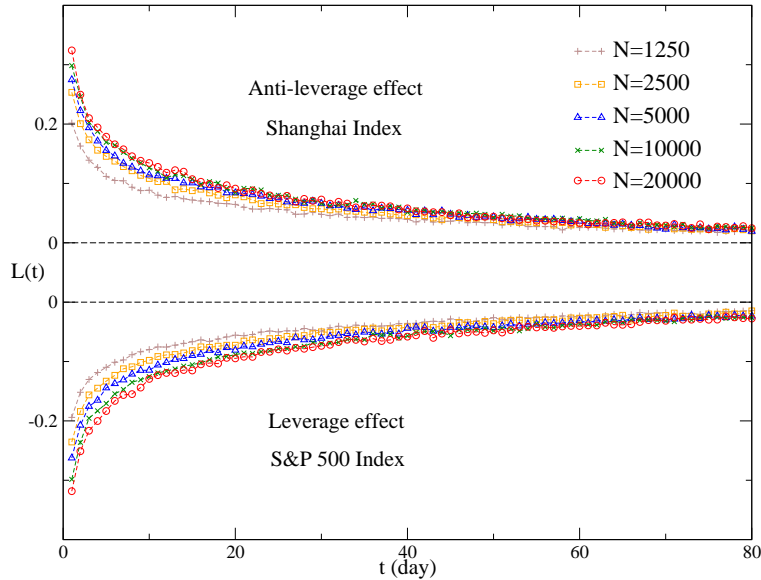

Figure 1:  $L(t)$  from the simulations with different  $N$  for the S&P 500 and Shanghai indices. The S&P 500 Index exhibits the leverage effect, and the Shanghai Index shows the anti-leverage effect. For each  $N$ , the simulation is performed 100 times for average.
